# Supplementary material for: miR675 Accelerates Malignant Transformation of Mesenchymal Stem Cells by Blocking DNA Mismatch Repair
Source: PubMed Central journal article supplement (PMC6307386; doi:10.1016/j.omtn.2018.11.010), 2018-11-24
Supplement: mmc1.pdf [file mmc1.pdf]

OMTN, Volume 14

## Supplemental Information

### **miR675 Accelerates Malignant Transformation of Mesenchymal Stem Cells by Blocking DNA Mismatch Repair**

**Yanan Lu, Shuting Song, Xiaoxue Jiang, Qiuyu Meng, Chen Wang, Xiaonan Li, Yuxin Yang, Xiaoru Xin, Qidi Zheng, Liyan Wang, Hu Pu, Xin Gui, Tianming Li, and Dongdong Lu**

## Figure S1

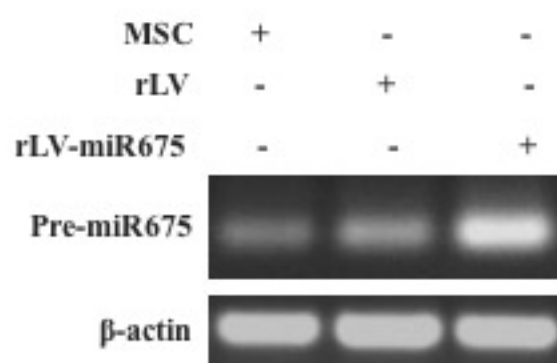

**Figure S2**

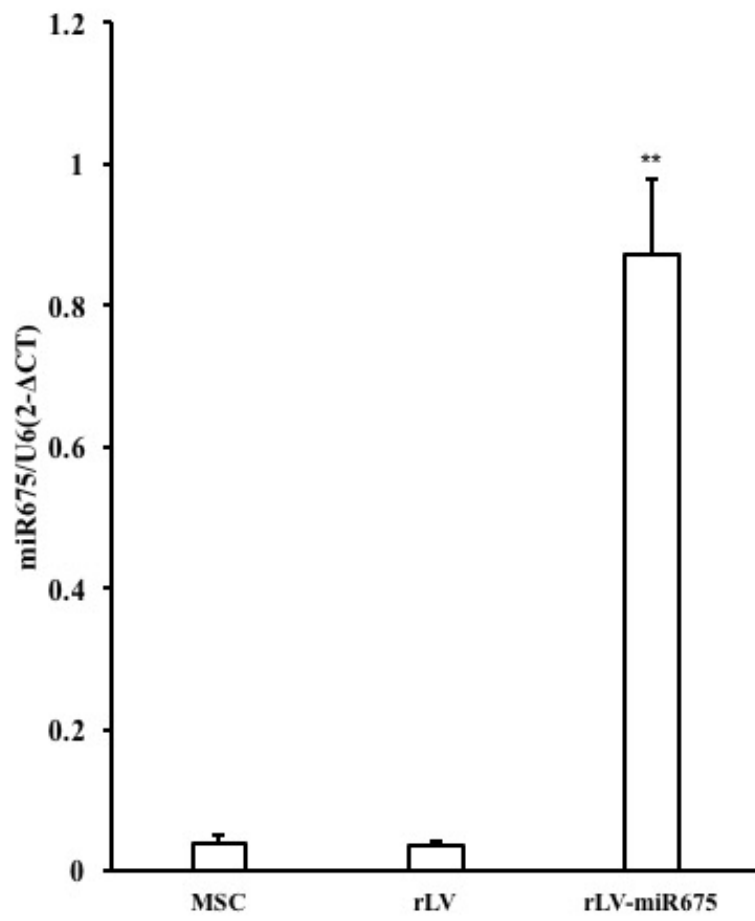

## **Supplemental FIGURE LEGENDS**

**FigureS1** RT-PCR analysis of pre-miR675 in the human mesenchymal stem cells (HBMMSCs) and in HBMMSCs infected with rLV, rLV-miR675, respectively.  $\beta$ -actin as internal control.

**FigureS2** Real-time RT-PCR analysis of mature miR675 in the human mesenchymal stem cells (HBMMSCs) and in HBMMSCs infected with rLV, rLV-miR675, respectively. U6 as internal control.
